# Supplementary material
Source: MDPI journal article supplement (https://www.mdpi.com/1424-2818/16/2/126)
Supplement: s1 [file s1]

**Supplementary Table S1.** List of specimens of the *Meranoplus ajax* complex sequenced in this study and their collection locations. Specimens are identified by their BOLD ID codes and arranged according to species.

| Species code | BOLD Specimen ID | Collection locality                        |
|--------------|------------------|--------------------------------------------|
| A1           | ASST021-18       | Daly Waters, NT                            |
|              | MERA143-17       | Daly Waters, NT                            |
|              | MTROP115-23      | Ngukurr, NT                                |
|              | OZBOL3871-21     | Hayfield Station, NT                       |
|              | OZBOL3872-21     | Hayfield Station, NT                       |
|              | OZBOL3873-21     | Hayfield Station, NT                       |
|              | OZBOL9203-22     | Hayfield Station, NT                       |
|              | OZBOL9204-22     | Amungee Mungee Station, NT                 |
|              | OZBOL9205-22     | Powell Creek Station, NT                   |
|              | OZBOL9209-22     | Shenandoah Station, NT                     |
|              | OZBOL9222-22     | Beetaloo Station, NT                       |
|              | OZBOL9207-22     | Beetaloo Station, NT                       |
| A2           | OZBOL9208-22     | Beetaloo Station, NT                       |
|              | OZBOL9221-22     | Beetaloo Station, NT                       |
| A3           | MTROP112-23      | Auvergne Station, NT                       |
|              | MTROP102-23      | Keep River National Park, NT               |
| A4           | MTROP124-23      | Daly Waters, NT                            |
| A5           | TEMEA009-19      | Talaroo Station, Qld                       |
| A6           | TEMEA008-19      | Laura, N Qld                               |
| A7           | MTROP148-23      | Weipa, N Qld                               |
| A8           | MTROP146-23      | Weipa, N Qld                               |
| B1           | MTROP150-23      | German Creek Mine, nr. Middlemount, Qld    |
|              | MTROP153-23      | Oak Park Station, Qld                      |
| B2           | MTROP149-23      | Townsville, N Qld                          |
| B3           | MERAN072-16      | Cape York Peninsula, N Qld                 |
| B4           | MTROP147-23      | Lakeland, N Qld                            |
| B5           | TEMEA010-19      | Lakefield National Park, N Qld             |
| B6           | MTROP154-23      | Bourke Devt Rd, Cape York Peninsula, N QLD |
|              | OZBOL1961-21     | Rinyirru National Park, N QLD              |
| C1           | MTROP118-23      | Montejinni, NT                             |
| C2           | MTROP103-23      | Kalkaringi, NT                             |
| C3           | MTROP109-23      | Bradshaw Field Training Area, NT           |
| C4           | MTROP145-23      | Kununurra, WA                              |
| C5           | MTROP100-23      | Kakadu National Park, NT                   |
| C6           | TEMEA013-14      | south Kimberley, WA                        |
|              | MERAN066-16      | Uluru National Park, NT                    |
|              | MTROP123-23      | Uluru National Park, NT                    |
|              | MTROP144-23      | Kiwirrkurra, Great Sandy Desert, WA        |
|              | OZBOL1950-21     | Umuwa, APYLands, SA                        |
|              | OZBOL1951-21     | Umuwa, APYLands, SA                        |
|              | OZBOL1952-21     | Umuwa, APYLands, SA                        |

|    |              |                                               |
|----|--------------|-----------------------------------------------|
|    | OZBOL1959-21 | Tanami Desert, NT                             |
|    | OZBOL1960-21 | Tanami Desert, NT                             |
|    | OZBOL3869-21 | Forest Hill Station, NT                       |
|    | OZBOL3870-21 | Forest Hill Station, NT                       |
|    | TEMEA007-19  | Umuwa, APYlands, SA                           |
|    | TEMEA017-19  | Umuwa, APYlands, SA                           |
| D1 | MTROP106-23  | Koolpin Gorge, National Park, Kakadu NT       |
|    | MTROP127-23  | Nitmiluk National Park, NT                    |
| D2 | ASST019-18   | Bridge Creek, nr Darwin, NT                   |
| D3 | OZBOL1953-21 | Ranger Uranium Mine, National Park, Kakadu NT |
| D4 | MTROP131-23  | Berry Springs, NT                             |
|    | MTROP132-23  | Victoria River Bridge, Victoria Hwy, NT       |
| D5 | MTROP135-23  | Victoria River Bridge, Victoria Hwy, NT       |
|    | TEMEA006-19  | Gregory National Park, NT                     |
| D6 | OZBOL6466-22 | Wyndham, WA                                   |
|    | BEET124-23   | Manbulloo Station, NT                         |
|    | MERA146-17   | Gove Mine, NT                                 |
|    | MERA155-17   | Gove Mine, NT                                 |
|    | MTROP104-23  | Nitmiluk National Park, NT                    |
|    | MTROP117-23  | Arnhem Land, NT                               |
| D7 | MTROP125-23  | Limmen National Park, NT                      |
|    | MTROP126-23  | Nitmiluk National Park, NT                    |
|    | MTROP130-23  | Gove Peninsula, NT                            |
|    | MTROP134-23  | Nhulunbuy, NT                                 |
|    | OZBOL9202-22 | Manbulloo Station, NT                         |
|    | OZBOL9206-22 | Hidden Valley Station, NT                     |
| E1 | MERA137-17   | Nitmiluk National Park, NT                    |
| E2 | ASST017-18   | Pine Creek, NT                                |
| E3 | MTROP121-23  | Darwin, NT                                    |
|    | MTROP129-23  | Daly River, NT                                |
|    | MERA149-17   | Theda Station, WA                             |
| E4 | MTROP140-23  | Lake Argyle, WA                               |
|    | MTROP141-23  | El Questro Station, WA                        |
|    | OZBOL6467-22 | Wyndham, WA                                   |
|    | ASST020-18   | north of Pine Creek                           |
|    | MERA140-17   | south of Pine Creek                           |
|    | MERA144-17   | south of Pine Creek                           |
|    | MERA145-17   | Pine Creek, NT                                |
|    | MERAN068-16  | Kakadu National Park, NT                      |
| E5 | MTROP122-23  | Kakadu National park                          |
|    | OZBOL1955-21 | Kakadu National Park                          |
|    | OZBOL3866-21 | Forrest Hill Station, NT                      |
|    | OZBOL3867-21 | Forrest Hill Station, NT                      |
|    | OZBOL3868-21 | Hayfield Station, NT                          |
|    | TEMEA005-19  | Mataranka Station, NT                         |
|    | BEET187-23   | Central Valley, Litchfield National Park, NT  |
| F1 | MERA136-17   | Litchfield National Park, NT                  |
|    | MTROP107-23  | Umbruwarra Gorge, NT                          |
| F2 | MERA142-17   | Litchfield National Park                      |

|     |              |                                                            |
|-----|--------------|------------------------------------------------------------|
| F3  | MERA152-17   | Hughes, nr. Darwin, NT                                     |
|     | MTROP133-23  | Litchfield National Park                                   |
|     | MTROP290-23  | Annaburroo Station, NT                                     |
|     | MTROP330-23  | Kakadu National Park                                       |
| F4  | MTROP331-23  | Kakadu National Park                                       |
|     | OZBOL1954-21 | Ranger Uranium Mine, Kakadu National Park, NT              |
|     | TEMEA004-19  | Ranger Uranium Mine, Kakadu National Park, NT              |
| X1  | MTROP152-23  | Lawn Hill Station, Qld                                     |
| X2  | MTROP120-23  | Manbulloo Station, NT                                      |
|     | MTROP098-23  | Gulf region, NT                                            |
|     | MTROP099-23  | Bonrook Station, Pine Creek, NT                            |
|     | MTROP101-23  | Roper River, NT                                            |
| X3  | MTROP105-23  | Nitmiluk National Park, NT                                 |
|     | MTROP108-23  | Roper River, NT                                            |
|     | MTROP116-23  | Barunga, NT                                                |
|     | MTROP128-23  | Dinner Creek, Kakadu National Park, NT                     |
| X4  | OZBOL1958-21 | Limmen National Park, NT                                   |
|     | OZBOL9201-22 | Manbulloo Station, NT                                      |
| X5  | TEMEA016-19  | Mitchell Falls, WA                                         |
|     | MTROP136-23  | Bohemia Downs Station, WA                                  |
| X6  | MTROP137-23  | Bohemia Downs Station, WA                                  |
|     | MTROP139-23  | Joon Joo, nr. Derby, WA                                    |
|     | OZBOL6456-22 | Broome, WA                                                 |
| X7  | MTROP138-23  | Halls Creek, WA                                            |
| X8  | MERA151-17   | Kimberley region, WA                                       |
|     | MTROP097-23  | Bachesten Creek, Kimberley region, WA                      |
| X9  | OZBOL6463-22 | Silent Grove, Kimberley region, WA                         |
|     | OZBOL6464-22 | Silent Grove, Kimberley region, WA                         |
| X10 | MTROP142-23  | Mitchell Plateau, Kimberley region, WA                     |
|     | MTROP143-23  | Mitchell Plateau, Kimberley region, WA                     |
|     | OZBOL6468-22 | Pentacost River, Gibb River Rd., East Kimberley region, WA |
| X11 | OZBOL6469-22 | Pentacost River, Gibb River Rd., East Kimberley region, WA |
|     | TEMEA012-19  | El Questro Station, WA                                     |
| X12 | MERA147-17   | Keep River National Park, NT                               |
| X13 | MERA148-17   | Theda Station, WA                                          |
